# Supplementary material for: Ocular counter-roll is less affected in experienced versus novice space crew after long-duration spaceflight
Source: PubMed Central journal article supplement (PMC9300597; doi:10.1038/s41526-022-00208-5), 2022-07-20
Supplement: 41526_2022_208_MOESM1_ESM.pdf [file 41526_2022_208_MOESM1_ESM.pdf]

**Manuscript:** “Ocular counter-roll less affected in experienced compared to novice space crew after long-duration spaceflight”

## **Supplementary material**

**Authors:** Catho Schoenmaekers<sup>1</sup>, Chloë De Laet<sup>1</sup>, Ludmila Kornilova<sup>2</sup>, Dmitrii Glukhikh<sup>2</sup>, Steven Moore<sup>3</sup>, Hamish MacDougall<sup>4</sup>, Ivan Naumov<sup>2</sup>, Erik Fransen<sup>5</sup>, Leander Wille<sup>1</sup>, Steven Jillings<sup>1</sup>, Floris L. Wuyts<sup>1\*</sup>

<sup>1</sup>Lab for Equilibrium Investigations and Aerospace, University of Antwerp, Belgium;

<sup>2</sup>Institute of Biomedical Problems, Moscow, Russia;

<sup>3</sup>Central Queensland University, School of Engineering and Technology, Queensland, Australia;

<sup>4</sup>University of Sydney School of Psychology, Sydney, New South Wales, Australia; and

<sup>5</sup>StatUa Center for Statistics, University of Antwerp, Antwerp, Belgium.

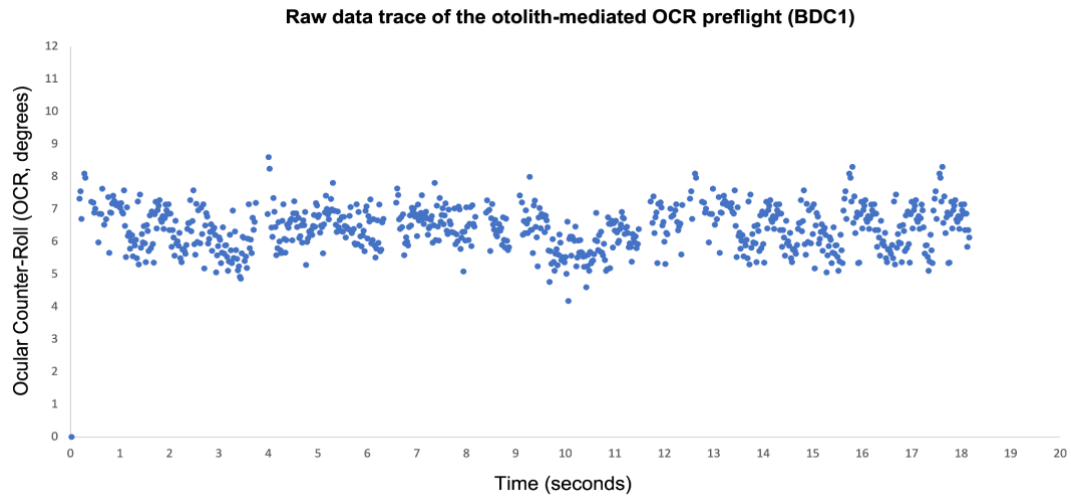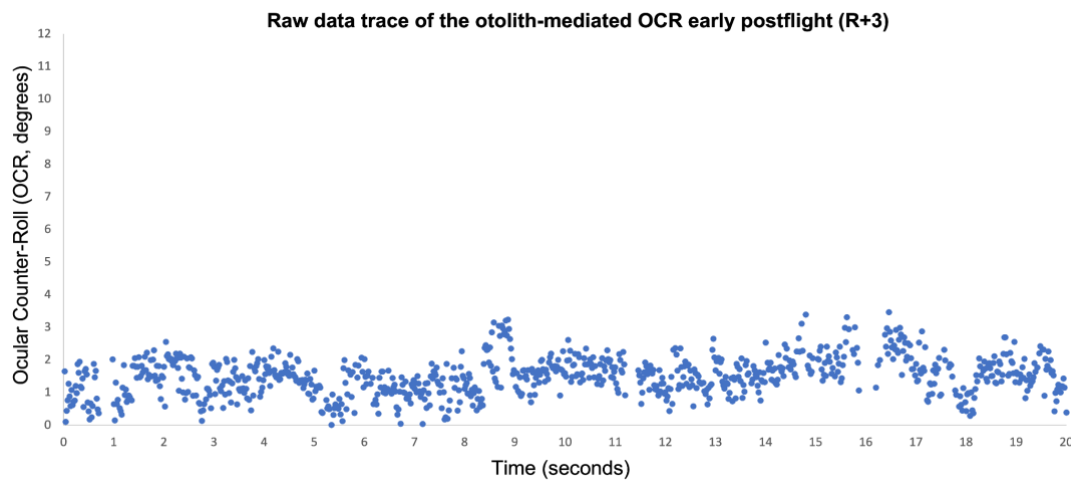

**Supplementary figure Raw data trace of the otolith-mediated ocular counter-roll (OCR) pre- and postflight (BDC1 and R+3).** Here we report an example of one cosmonaut's (first-time flier) OCR raw trace for one preflight (BDC1) and a three days after return (R+3) measurement.
